# Supplementary material for: Systematic analysis of relationships between plasma branched-chain amino acid concentrations and cardiometabolic parameters: an association and Mendelian randomization study
Source: BMC Med. 2022 Dec 15;20:485. doi: 10.1186/s12916-022-02688-4 (PMC9753387; doi:10.1186/s12916-022-02688-4)

## **Systematic analysis of relationships between plasma branched-chain amino acid concentrations and cardiometabolic parameters: an association and Mendelian randomization study**

### Table of Contents

|                                                                                                                                       |          |
|---------------------------------------------------------------------------------------------------------------------------------------|----------|
| <i>Figure S1: Effect size comparison with and without adjustment for eGFR. ....</i>                                                   | <i>2</i> |
| <i>Figure S2: Effect size comparisons of BCAAs association with fat distribution in the 3000B cohort. ....</i>                        | <i>3</i> |
| <i>Figure S3: Effect size comparisons of BCAA associations with cytokines and cell counts in both the LLD and 3000B cohorts. ....</i> | <i>4</i> |
| <i>Figure S4: Effect size comparisons of BCAA associations with TMAO and its precursors in both the LLD and 3000B cohorts. ....</i>   | <i>5</i> |
| <i>Figure S5: Effect size comparison with and without correcting for diabetes and insulin resistance. ....</i>                        | <i>6</i> |

**Figure S1: Effect size comparison with and without adjustment for eGFR.**

X-axis refers to the estimated effect size (beta value) without adjustment for eGFR. Y-axis refers to the estimated effect size (beta value) after adjustment for eGFR. Each dot represents an association between a BCAA and a CMD parameter. The dots are colored – light blue for isoleucine, dark blue for valine and orange for leucine – with fitted lines drawn separately for different BCAAs. The consistency between two estimations was assessed using Pearson correlation.

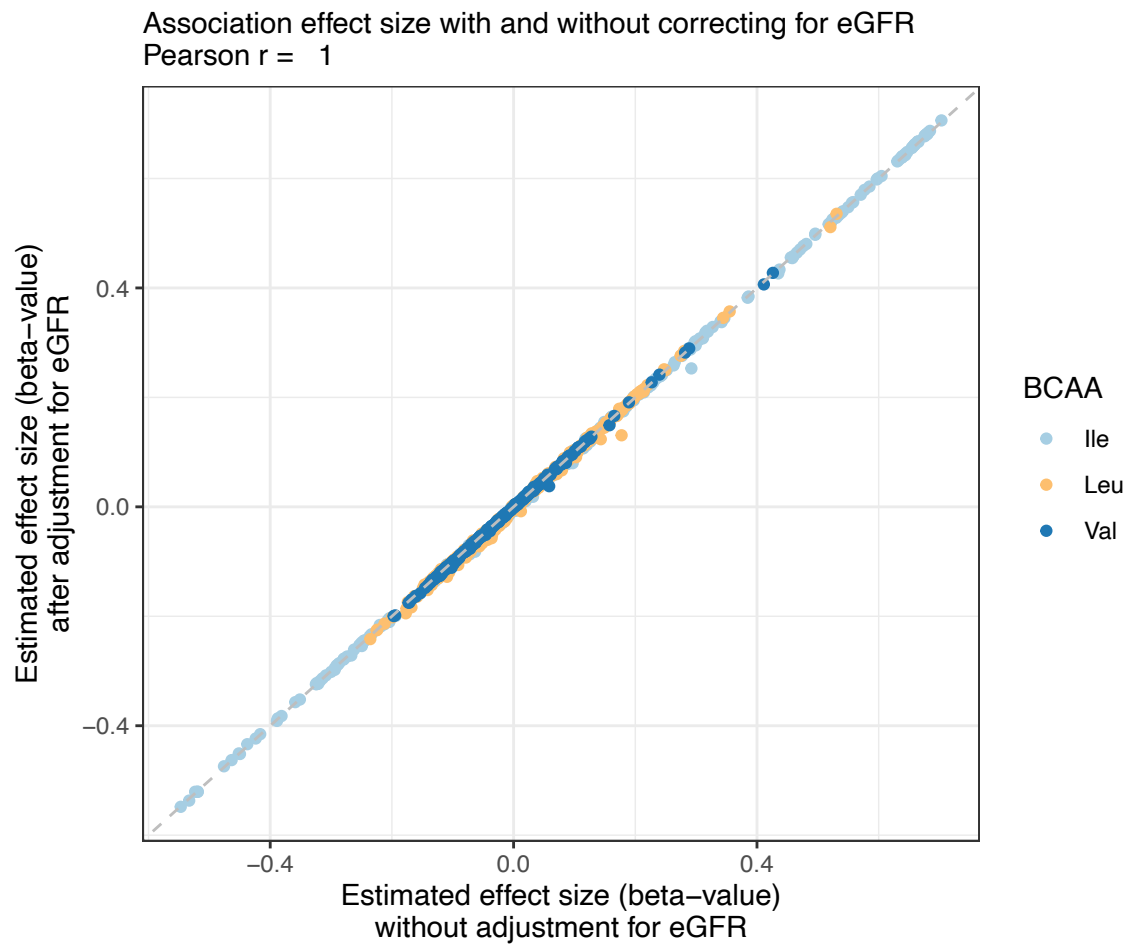

**Figure S2: Effect size comparisons of BCAAs association with fat distribution in the 3000B cohort.**

The estimated effect sizes are shown as forest plots for the different BCAAs separately. The red dots with bar represent the estimated effect sizes with 95% confidence intervals in the 3000B cohort. If the association is significant at FDR < 0.05 level, the effect is presented as a filled dot. Otherwise, the effect is presented as an open dot.

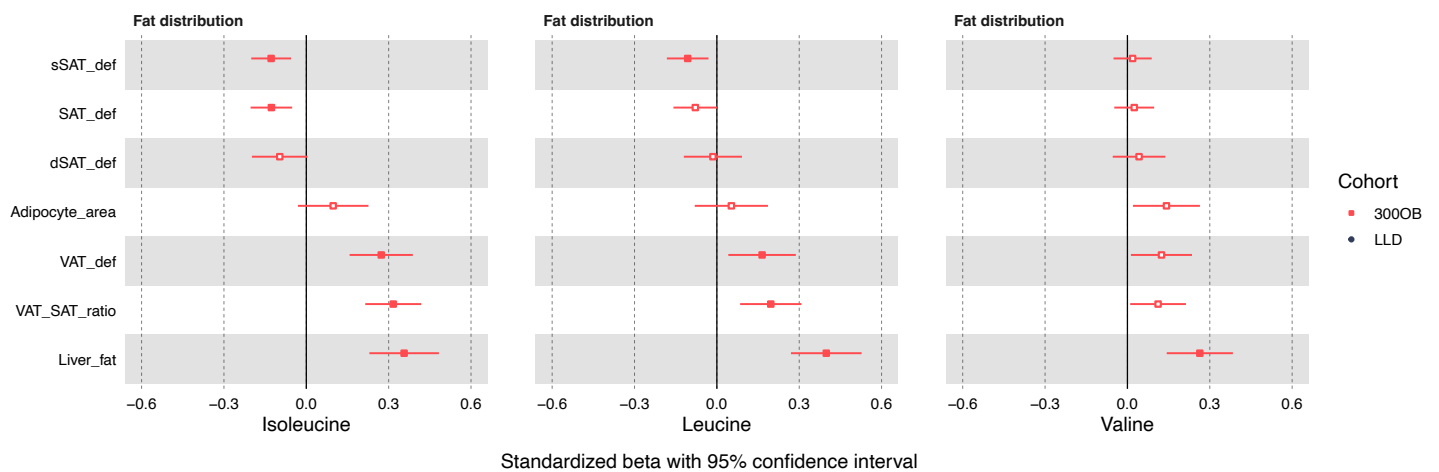

**Figure S3: Effect size comparisons of BCAA associations with cytokines and cell counts in both the LLD and 300OB cohorts.**

The estimated effect sizes are shown as forest plots for the different BCAAs separately. The red dots with bar represent to the estimated effect sizes with 95% confidence intervals in the 300OB cohort. The black dots with bar represent to the estimated effect sizes with 95% confidence intervals in the LLD cohort. If the association was significant at FDR < 0.05 level, the effect is presented as a filled dot. Otherwise, the effect is presented as an open dot.

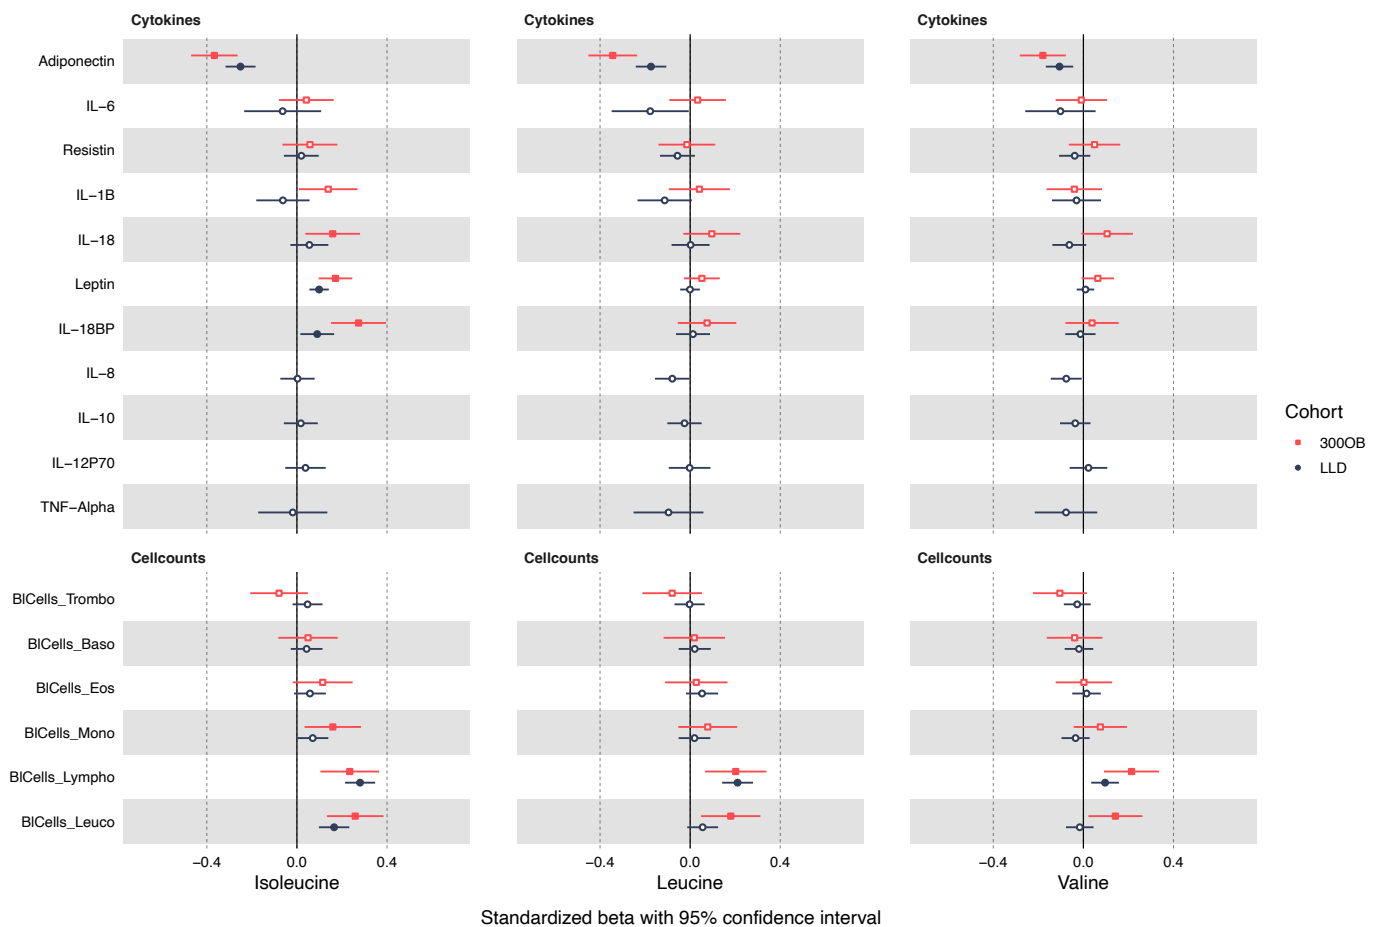

**Figure S4: Effect size comparisons of BCAA associations with TMAO and its precursors in both the LLD and 300OB cohorts.**

The estimated effect sizes are shown as forest plots for the different BCAAs separately. The red dots with bar represent to the estimated effect sizes with 95% confidence intervals in the 300OB cohort. The black dots with bar represent to the estimated effect sizes with 95% confidence intervals in the LLD cohort. If the association was significant at FDR < 0.05 level, the effect is presented as a filled dot. Otherwise, the effect is presented as an open dot.

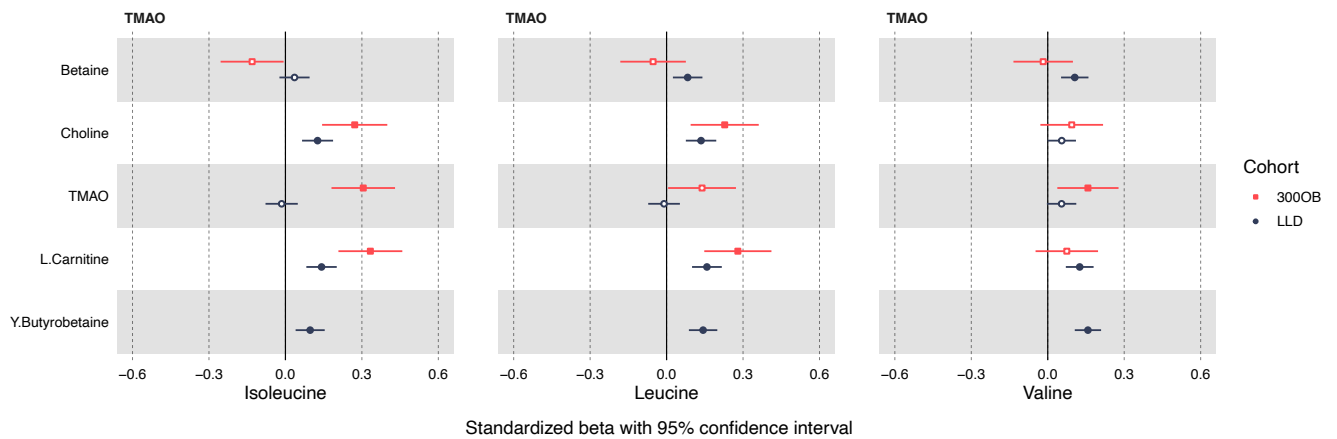

**Figure S5: Effect size comparison with and without correcting for diabetes and insulin resistance.**

**A)** The effect size comparison with and without T2D patients in the 3000B cohort. **B)** The effect size comparison with and without adjustment for HOMA-IR in the LLD cohort. X-axis refers to the estimated effect size (beta value) without adjustment. Y-axis refers to the estimated effect size (beta value) after adjustment. Each dot represents an association between a BCAA and a CMD parameter. The dots are colored light blue for isoleucine, dark blue for valine and orange for leucine, with fitted lines drawn separately for the different BCAAs.

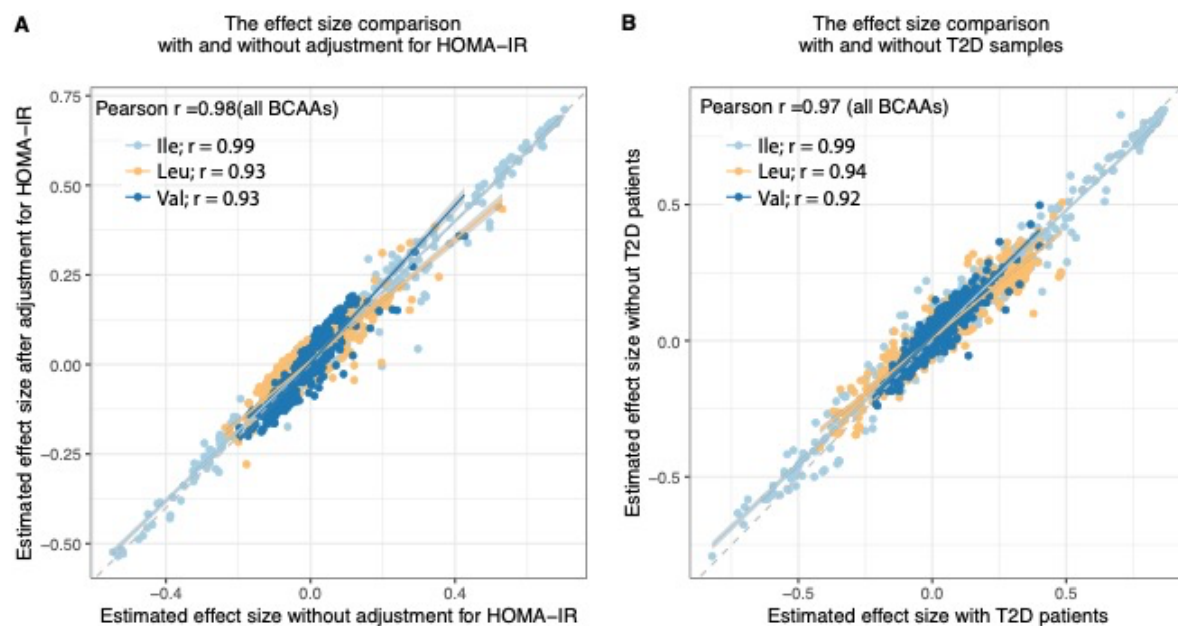

Supplement: Supplementary file 2 — Additional file 2: Figures S1-S5. Figure S1 - Effect size comparison with and without adjustment for eGFR. Figure S2 -Effect size comparisons of BCAAs association with fat distribution in the 300OB cohort. Figure S3 - Effect size comparisons of BCAA associations with cytokines and cell counts in both the LLD and 300OB cohorts. Figure S4 - Effect size comparisons of BCAA associations with TMAO and its precursors in both the LLD and 300OB cohorts. Figure S5 - Effect size comparison with and without correcting for diabetes and insulin resistance [file 12916_2022_2688_MOESM2_ESM.pdf]
